# Supplementary material for: Light-Responsive Polymeric Micellar Nanoparticles with Enhanced Formulation Stability
Source: MDPI journal article supplement (doi:10.3390/polym13030377), 2021-01-26
Supplement: s1 [file s1]

# Light-Responsive Polymeric Micellar Nanoparticles with Enhanced Formulation Stability

Kyoung Nan Kim <sup>1</sup>, Keun Sang Oh <sup>2</sup>, Jiwook Shim <sup>3</sup>, Isabel R. Schlaepfer <sup>4</sup>, Sana D. Karam <sup>5</sup> and Jung-Jae Lee <sup>1,6,\*</sup>

<sup>1</sup> Department of Chemistry, University of Colorado Denver, Denver, CO 80204, USA; kyoung.kim@ucdenver.edu

<sup>2</sup> TGel Bio, Co, LTD, Seoul 06185, Korea; oks5486@nate.com

<sup>3</sup> Department of Biomedical Engineering, Rowan University, Glassboro, NJ 08028, USA; shimj@rowan.edu

<sup>4</sup> Division of Medical Oncology, Anschutz Medical Campus, University of Colorado, Aurora, CO 80045, USA; isabel.schlaepfer@cuanschutz.edu

<sup>5</sup> Department of Radiation Oncology, Anschutz Medical Campus, University of Colorado, Aurora, CO 80045, USA; sana.karam@cuanschutz.edu

<sup>6</sup> Department of Bioengineering, University of Colorado Denver, Denver, CO 80204, USA

\* Correspondence: Jungjae.Lee@ucdenver.edu; Tel.: +303-315-7671

**Citation:** Kim K.N.; Oh K.S.; Shim J.; Schlaepfer I.R.; Karam S.D.; Lee J.-J. Light Responsive Polymeric Micellar Nanoparticles with Enhanced Formulation Stability *Polymers* **2021**, *13*, 377. <https://doi.org/10.3390/polym13030377>

Received: 5 January

Accepted: 22 January

Published: 26 January

**Publisher's Note:** MDPI stays neutral with regard to jurisdictional claims in published maps and institutional affiliations.

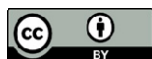

**Copyright:** © 2021 by the authors. Licensee MDPI, Basel, Switzerland. This article is an open access article distributed under the terms and conditions of the Creative Commons Attribution (CC BY) license (<http://creativecommons.org/licenses/by/4.0/>).

**Figure S1.** Synthesis of PEG-PLL-DNQ and PEG-PLL-Oct, and the chemical structures of DTX and NR: **S-2**

**Figure S2.** Wolff Rearrangement of PEG-PLL-DNQ upon UV light irradiation: **S-3**.

**Figure S3.** DLS size distribution and TEM image of DTX-NP<sub>oct</sub>: **S-4**.

**Table S1.** Measurement of Drug Loading Efficiency (LE) and Capacity (LC): **S-5**.

**Figure S4.** DLS measurement of size change of NR-NP<sub>oct</sub> in BSA solution: **S-6**.

**Figure S5.** HUVECs Viability of Polymers (PEG-PLL-DNQ & PEG-PLL-Oct): **S-7**.

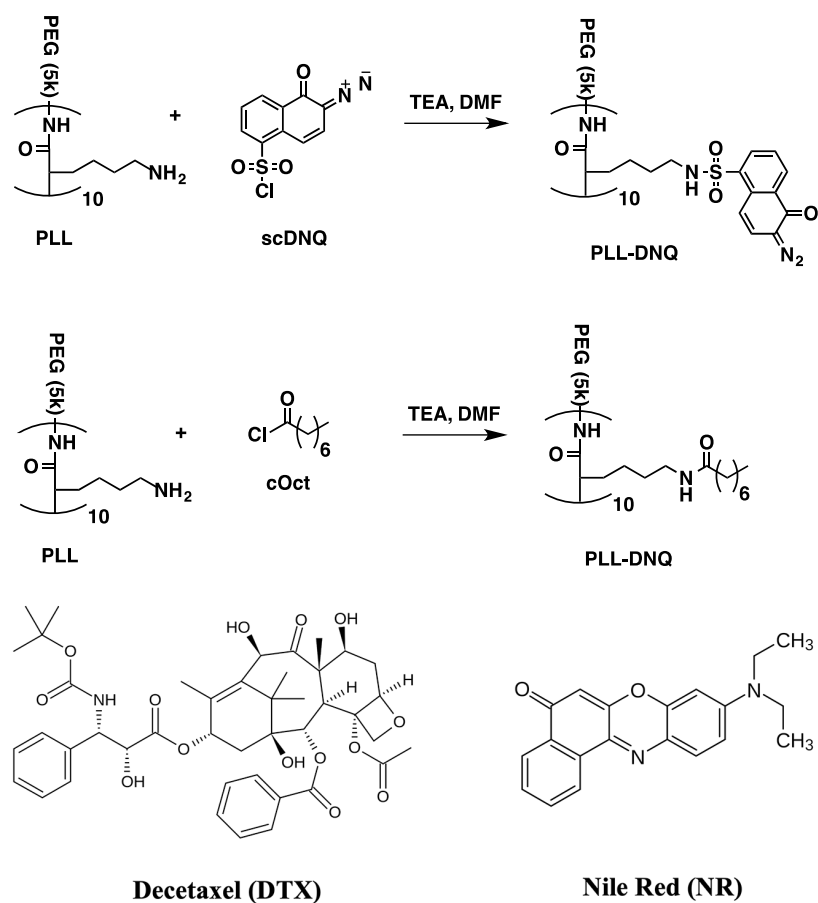

**Figure S1.** Synthesis of PEG-PLL-DNQ and PEG-PLL-Oct, and the chemical structures of DTX and NR.

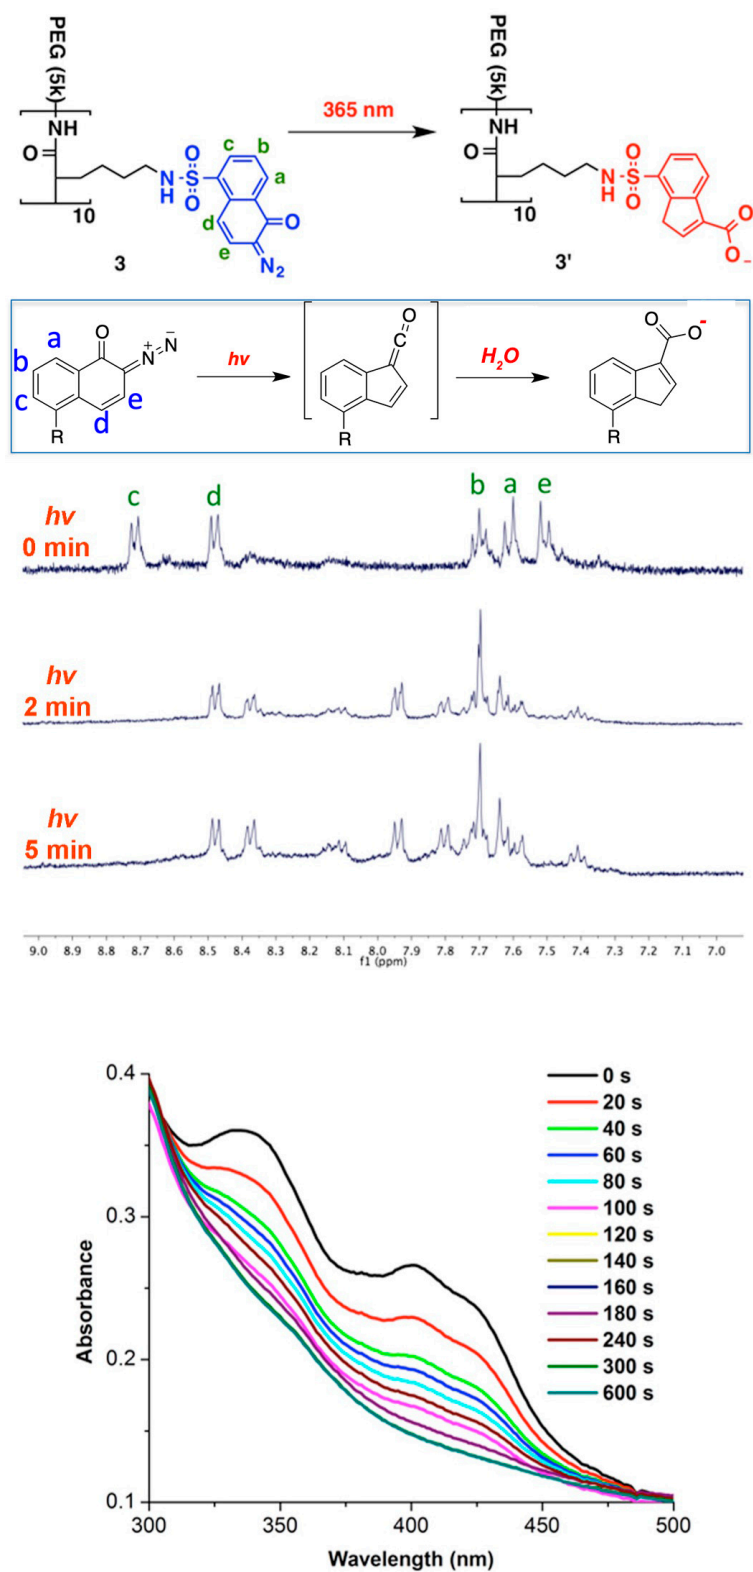

**Figure S2.** Wolff Rearrangement of PEG-PLL-DNQ upon UV light irradiation (365 nm, 50 mW/cm<sup>2</sup>) (<sup>1</sup>H NMR & UV/Vis Spectroscopy).

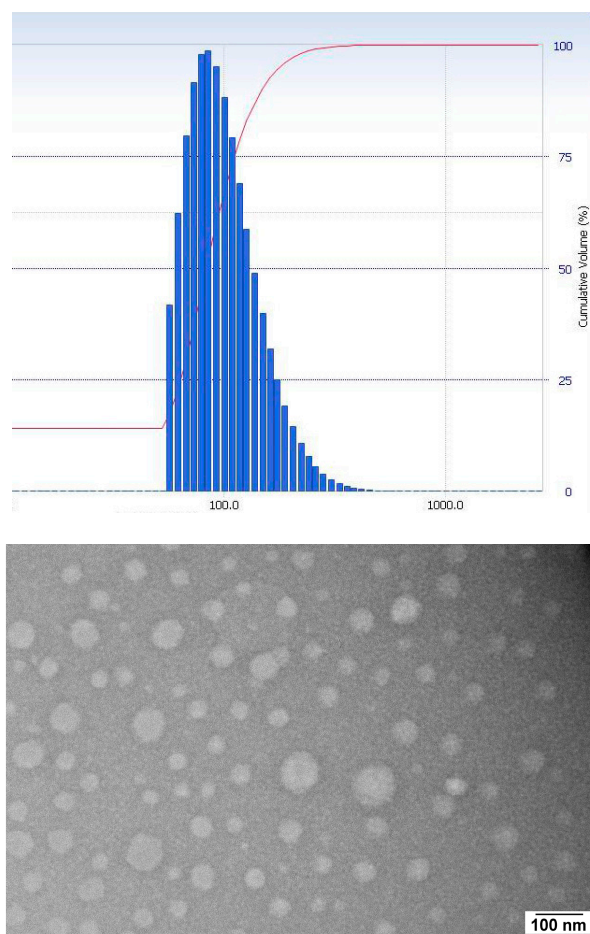

**Figure S3.** DLS size distribution and TEM image of DTX-NP<sub>oct</sub>.

**Table S1.** Measurement of Drug Loading Efficiency (LE) and Capacity (LC).

| <b>Theoretical LD %</b> | <b>Actual LD %<br/>DTX-NP<sub>DNQ</sub></b> | <b>LD efficiency %<br/>DTX-NP<sub>DNQ</sub></b> | <b>Actual LD %<br/>DTX-NP<sub>Oct</sub></b> | <b>LD efficiency %<br/>DTX-NP<sub>Oct</sub></b> |
|-------------------------|---------------------------------------------|-------------------------------------------------|---------------------------------------------|-------------------------------------------------|
| 5                       | 4.72 ± 0.07                                 | 94.4                                            | 4.43 ± 0.06                                 | 88.6                                            |
| 10                      | 8.61 ± 0.16                                 | 86.1                                            | 7.91 ± 0.13                                 | 79.1                                            |
| 15                      | 13.54 ± 0.27                                | 90.3                                            | 8.73 ± 0.3                                  | 58.2                                            |
| 20                      | 14.42 ± 0.49                                | 72.1                                            | 9.20 ± 0.35                                 | 46.0                                            |

Determined by HPLC. Abbreviations: LD: loading. Data are mean ± SD (N = 4).

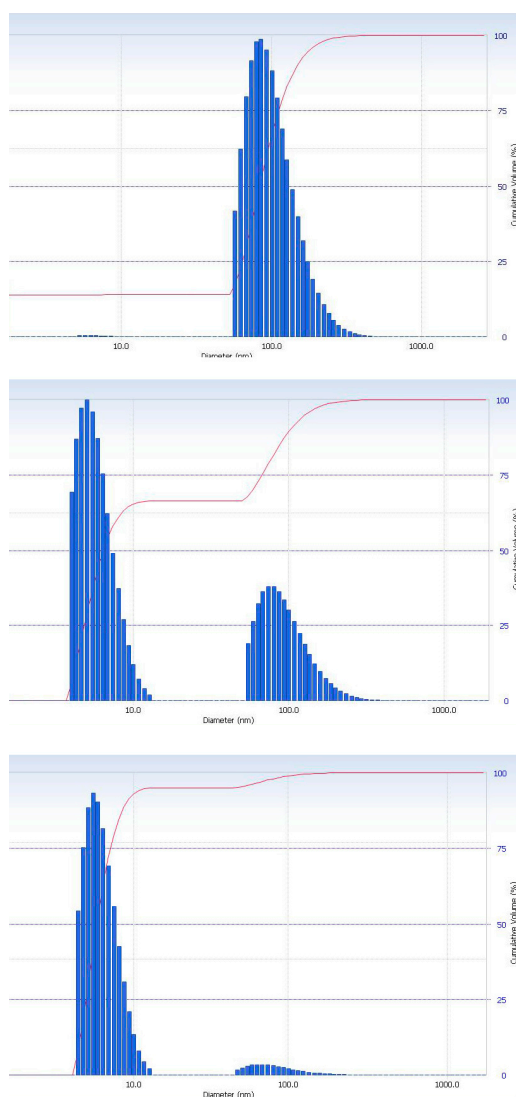

**Figure S4.** DLS measurement of size change of NR-NP<sub>Oct</sub> in BSA solution (0, 12, and 48 h).

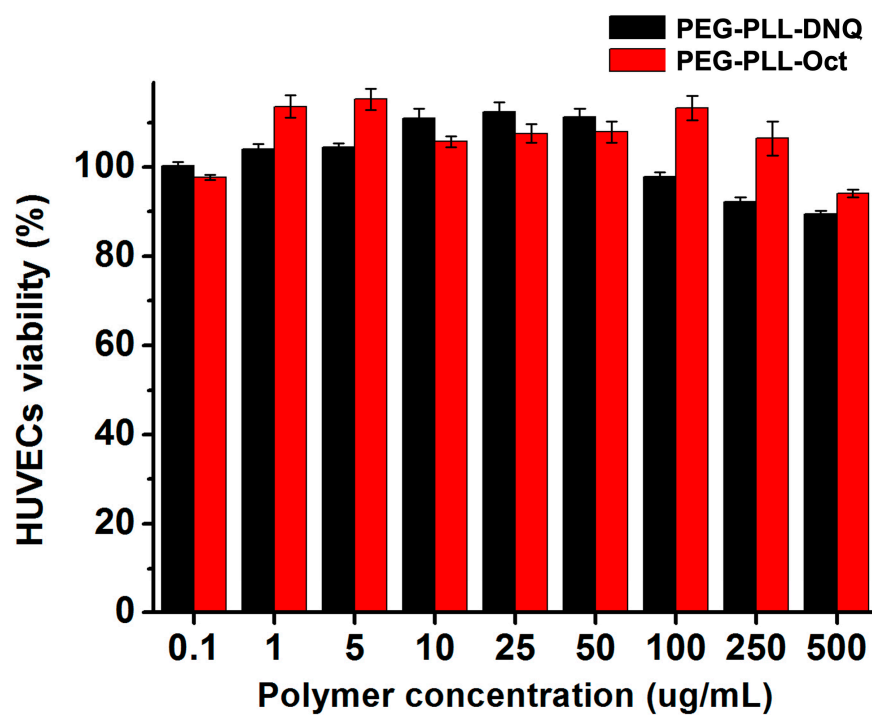

Figure S5. HUVECs Viability of Polymers (PEG-PLL-DNQ & PEG-PLL-Oct).
